# Supplementary material for: Successful clinical practices to prevent necrotizing enterocolitis drive different microbiome profiles and functional responses in the preterm intestine
Source: Research Square preprint supplement (doi:10.21203/rs.3.rs-1807088/v1), 2022-07-06
Supplement: Supplementary file 1 [file 8f3a7706bd4e9b3d1b567b56.docx]

16.1) Supplemental information


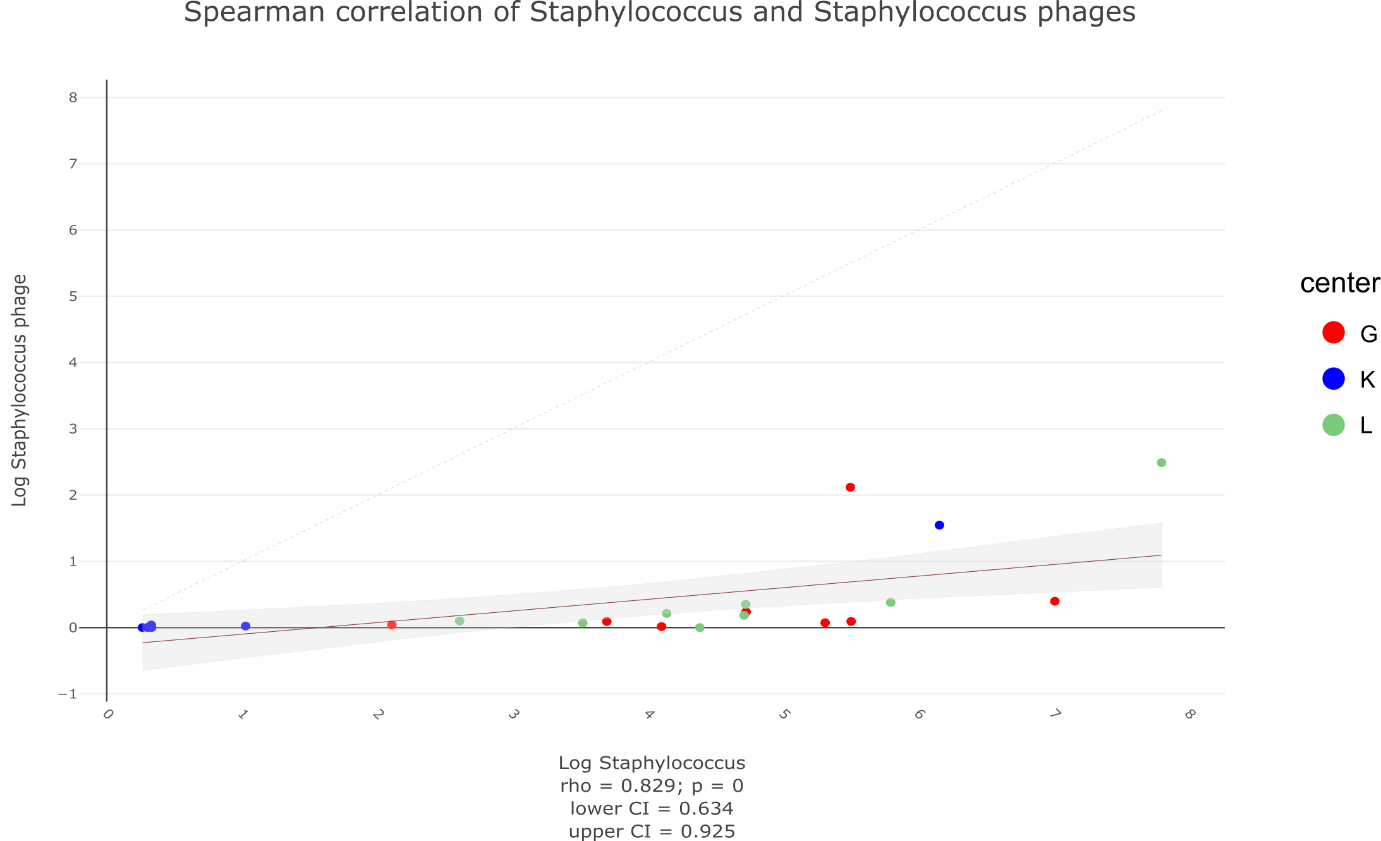


*Suppl. Fig. 1: Spearman Correlation of Staphylococcus with Staphylococcus phages*

*Suppl. Table 1: timepoint of stool sample collections*

| Time Points | Minimum | Maximum | Mean |
| --- | --- | --- | --- |
| tp1 | 1 | 3 | 1.56 |
| tp2 | 3 | 6 | 3.75 |
| tp3 | 5 | 8 | 5.82 |
| tp4 | 7 | 15 | 8.04 |
| tp5 | 9 | 13 | 10.06 |
| tp6 | 11 | 15 | 12.15 |
| tp7 | 13 | 21 | 14.50 |

*Suppl. Table 2: Bifidobacterium reference genomes*

| sample | *Bifidobacterium longum subsp. longum* JCM1217T | *Bifidobacterium longum subsp. infantis* JCM1222T | *Bifidobacterium catenulatum subsp. Kashiwanohense* JCM15439T | *Bifidobacterium longum subsp. suillum* JCM19995T | *Bifidobacterium longum subsp.suis* JCM1269T | *Bifidobacterium breve* JCM1192T | *Bifidobacterium bifidum* JCM1255T |
| --- | --- | --- | --- | --- | --- | --- | --- |
| K08-7 | 46.59% | 86.80% | 3.99% | 49.90% | 48.67% | 17.49% | 3.70% |
| K11-7 | 50.14% | 97.98% | 4.31% | 53.85% | 52.17% | 18.70% | 3.81% |
| K13-7 | 52.26% | 95.56% | 4.22% | 55.66% | 54.27% | 19.55% | 4.20% |
| K14-7 | 53.31% | 00.07% | 4.28% | 56.91% | 55.43% | 19.80% | 4.15% |
| K15-7 | 51.31% | 97.60% | 4.30% | 54.76% | 53.22% | 19.36% | 4.09% |
| K16-7 | 3.07 % | 6.01% | 0.26% | 3.30% | 3.66% | 1.14% | 0.23% |
| K17-7 | 48.87% | 97.38% | 4.31% | 52.49% | 50.76% | 18.34% | 3.74% |
| K18-7 | 22.63% | 43.34% | 1.94% | 24.29% | 23.55% | 8.48% | 1.76% |

*Suppl. Table 3: Distribution of overall reads (56,660,357) into Archaea, Ascomycetes-Basidiomycetes, Viruses and Bacteria as well as in their highest abundant subgroups. Distribution is given in overall reads and percentages and each for the three centers.*

|  | **Archaea** | **Fungi:**  **Asco-Basidio** | | **Viruses** | **Bacteria** | | | | | |
| --- | --- | --- | --- | --- | --- | --- | --- | --- | --- | --- |
| **all** | 24,081 (0.04%) | 53,192  (0.09%) | | 83,670 (0.15%) | 56,446,924 (99.62%) | | | | | |
| **G** | 8,906 (36.98%) | 11,522  (21.66%) | | 20,860 (24.93%) | 15,677,124 (27.77%) | | | | | |
| **K** | 6,937 (28.81%) | 14,918  (28.05%) | | 30,894 (36.92%) | 20,204,643 (35.79%) | | | | | |
| **L** | 8,238 (34.21%) | 26,752  (50.29%) | | 31,916 (38.15%) | 20,565,157 (36.43%) | | | | | |
|  | Methano-gens | Asco-mycota | Basidio-mycota | Phages |  |  |  |  |  |  |
| **all** | 15,040 (62.46%) | 13,662 (25.68%) | 3,9530 (74.32%) | 83,670  (100%) |  |  |  |  |  |  |
| **G** | 5,482 (36.45%) | 5,632 (41.22%) | 5,890 (14.90%) | 20,860 (24.93%) |  |  |  |  |  |  |
| **K** | 4,813 (32.00%) | 1,298 (9.50%) | 13,620 (34.45%) | 30,894 (36.92%) |  |  |  |  |  |  |
| **L** | 4,745 (31.55%) | 6,732 (49.28%) | 20,020 (50.65%) | 31,916 (38.15%) |  |  |  |  |  |  |
|  | *Methano-brevibacter* |  |  |  | *Enterococcus* | *Bifidobacterium* | *Geobacillus* | *Lactobacillus* | *Escherichia* | *Staphylococcus* |
| **all** | 2,193 (14.58%) |  |  |  | 28,334,208 (50.20%) | 16,144,186 (28.60%) | 289,736  (0.51%) | 1,501,052 (2.66%) | 1,187,293 (2.10%) | 2,414,309  (4.28%) |
| **G** | 943  (43.00%) |  |  |  | 11,089,852 (39.14%) | 11,506  (0.07%) | 38,973  (13.45%) | 853,834  (56.88%) | 36,431 (3.07%) | 827,634  (34.28%) |
| **K** | 99  (4.51%) |  |  |  | 1,506,496 (5.32%) | 16,115,145 (99.82%) | 202,224 (69.80%) | 74,547  (4.97%) | 1,145,599 (96.49%) | 258,229  (10.70%) |
| **L** | 1,151 (52.49%) |  |  |  | 15,737,860 (55.54%) | 17,535  (0.11%) | 48,539  (16.75%) | 572,671  (38.15%) | 5,263 (0.44%) | 1,328,446 (55.02%) |


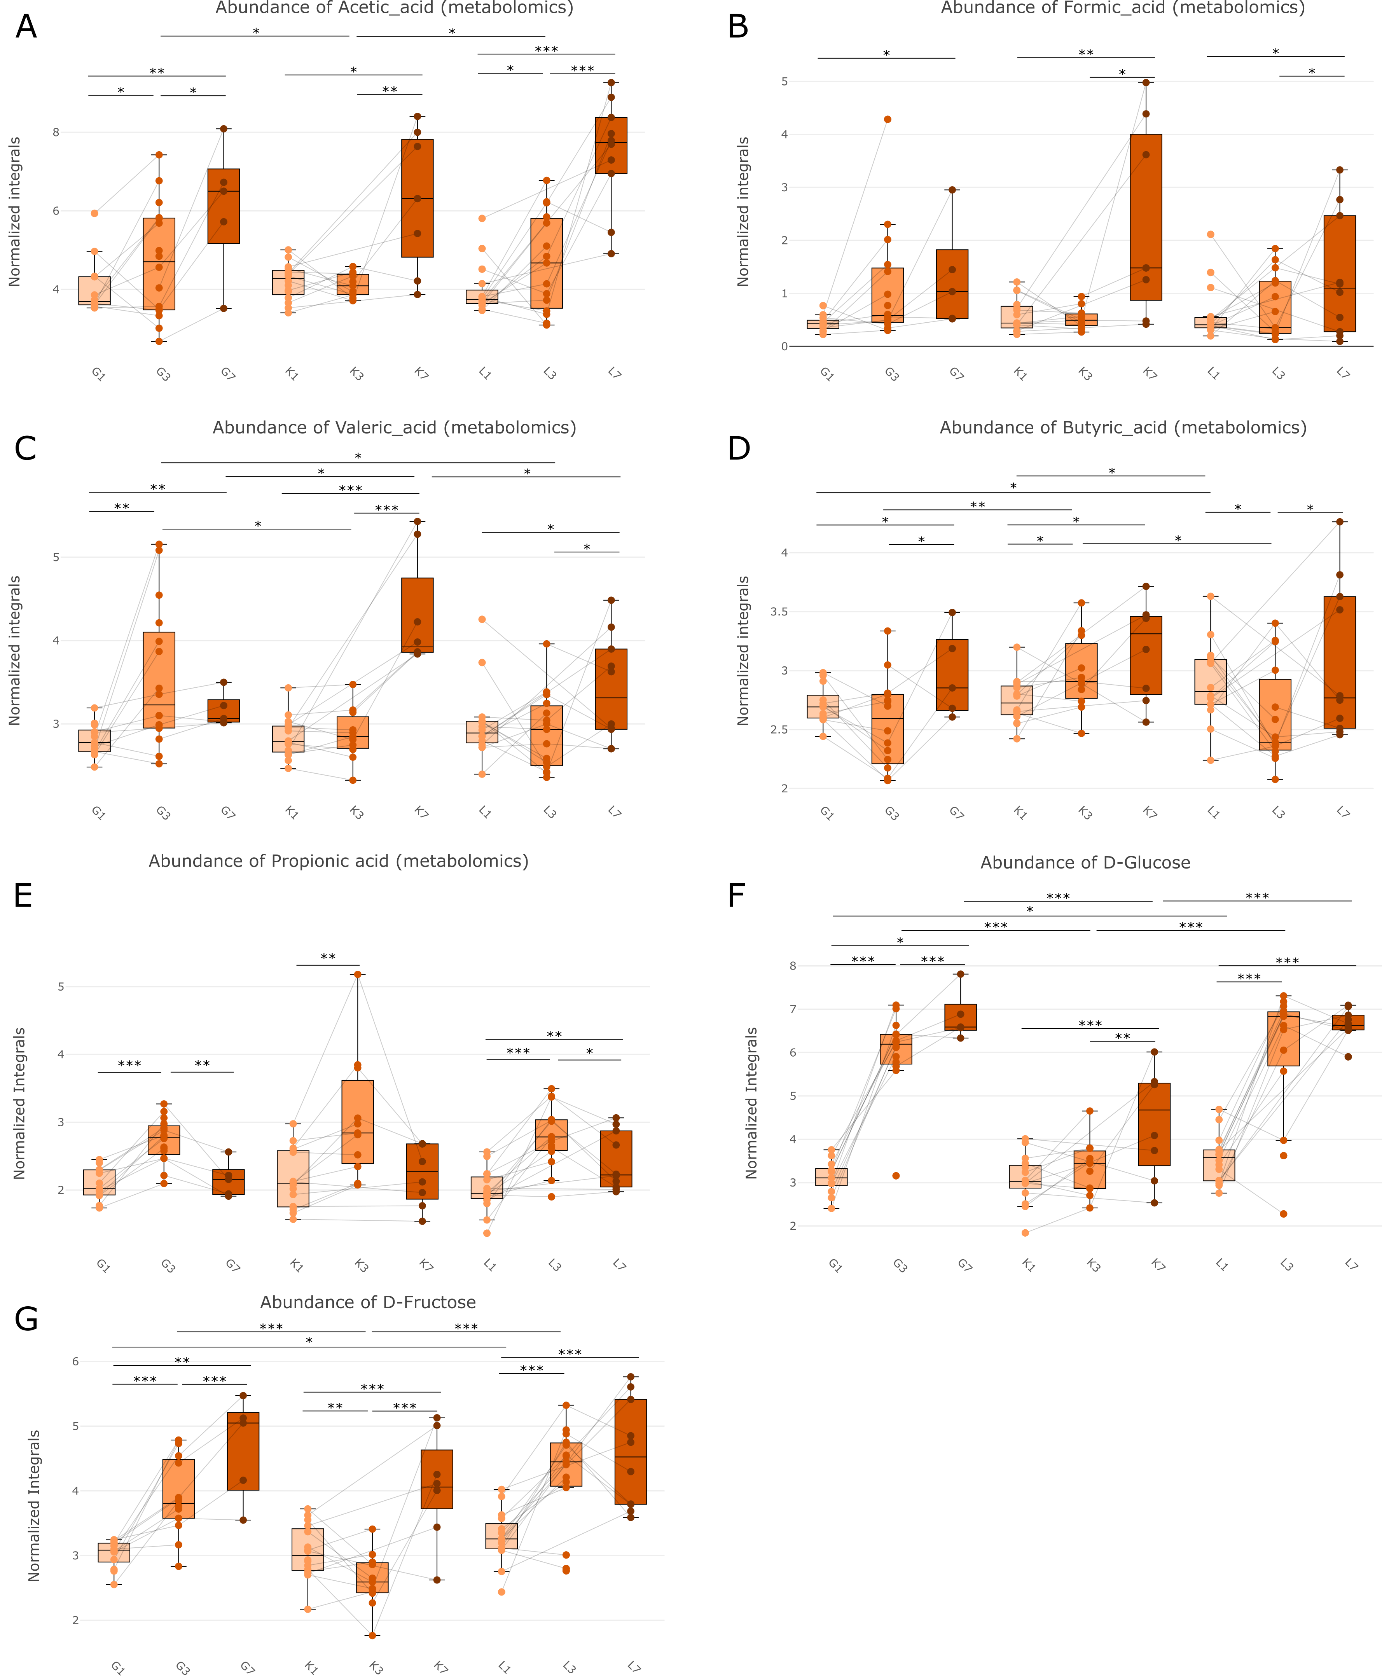


*Suppl. Fig 2: Normalized integrals of several metabolites over time (tp1, tp3, tp7) and centers (G, K, L); A) acetic acid, B) formic Acid, C) valeric acid, D) butyric acid, E) propionic acid, F) D-glucose, and G) D-fructose*

*
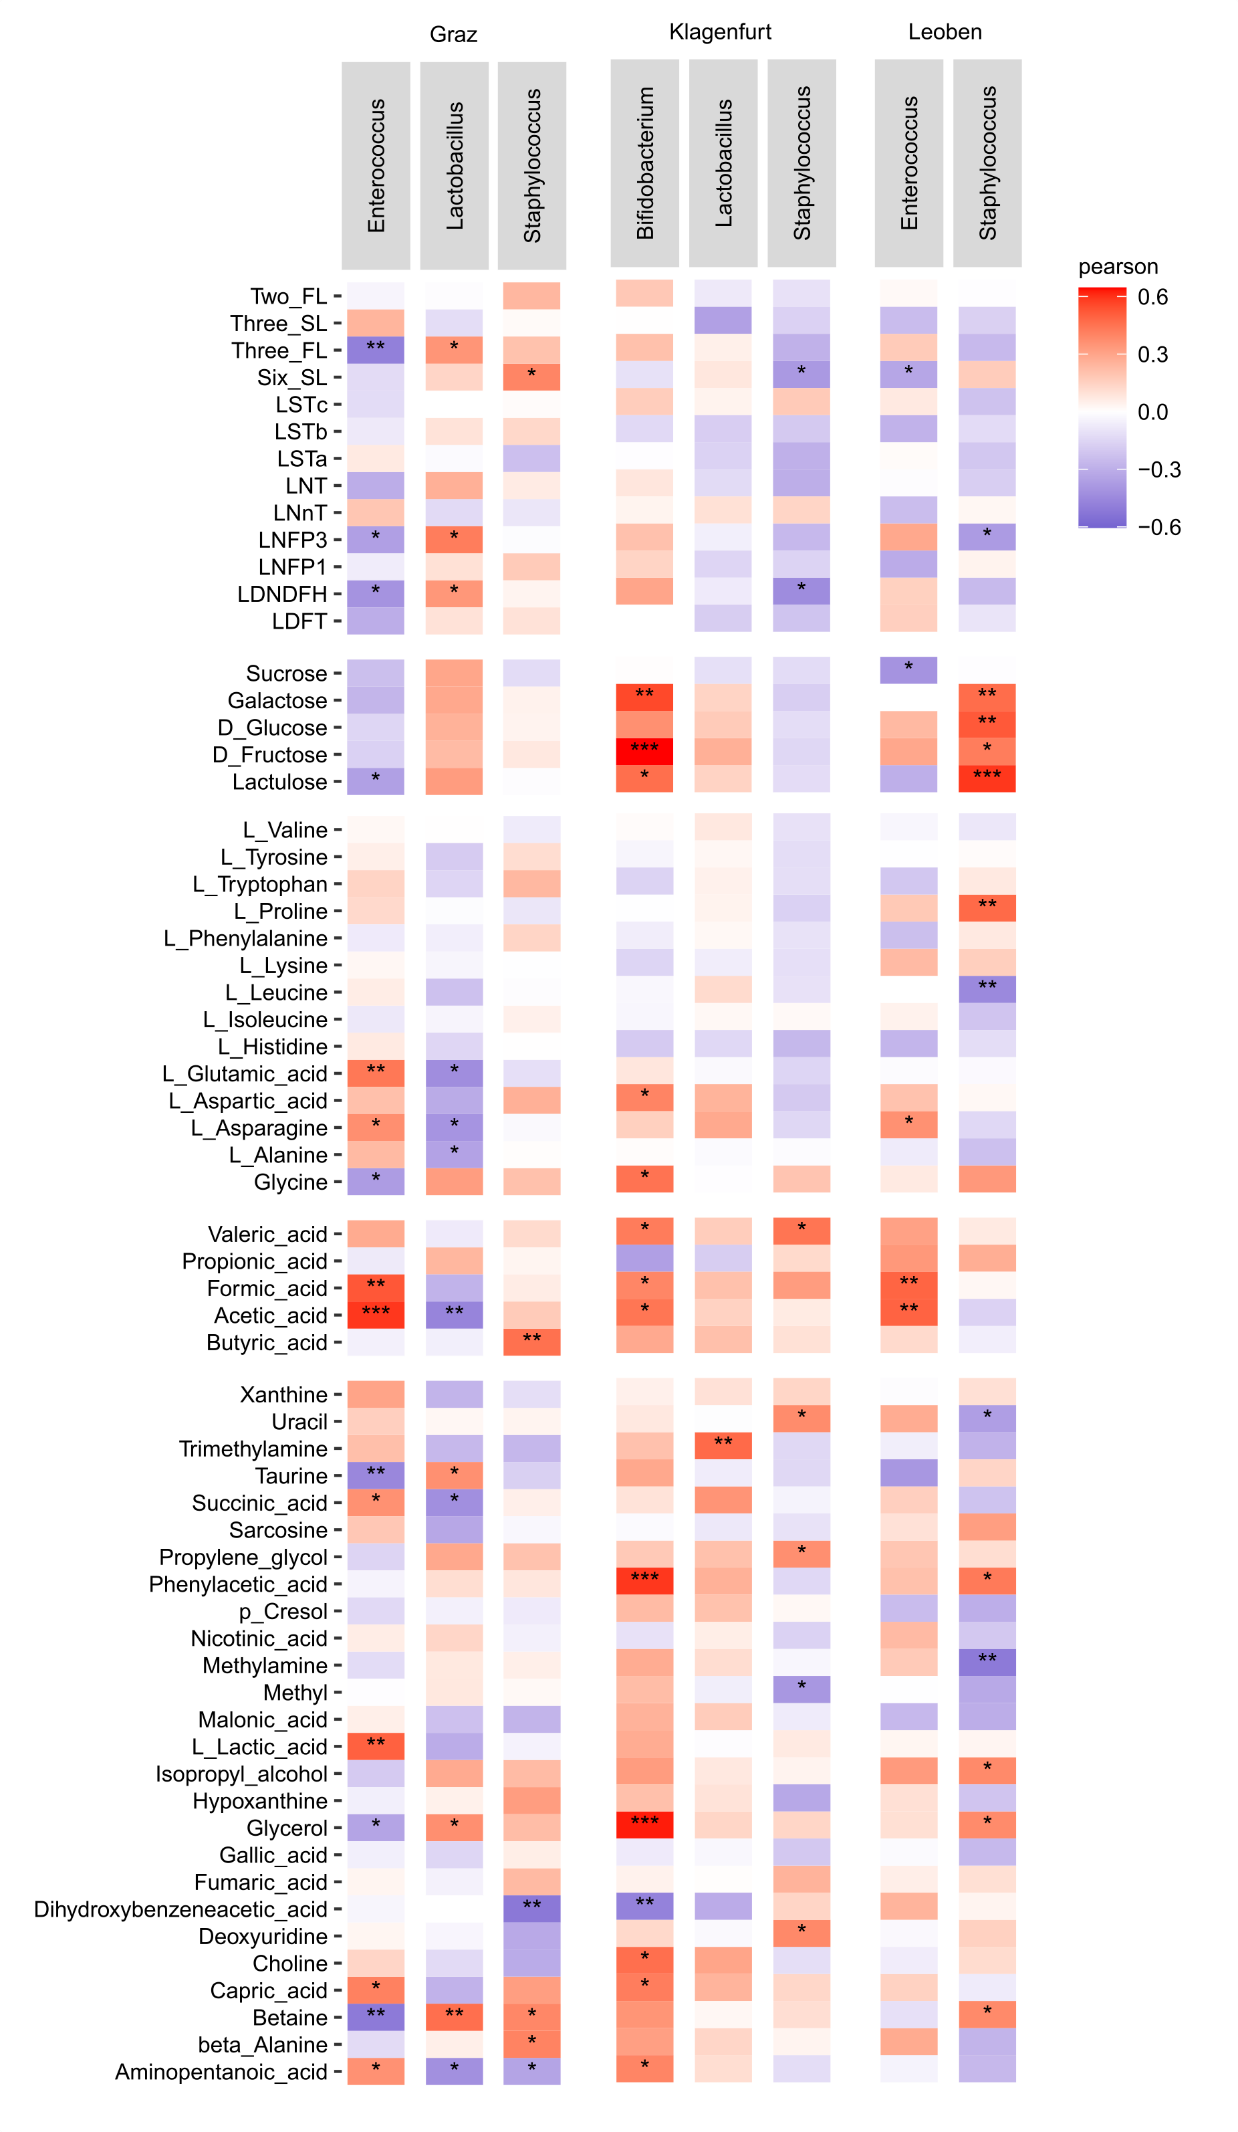
*

*Suppl. Fig. 3: Complete heat map of correlation of metabolites and key-taxa of the three centers.*
