# Supplementary material for: Successful clinical practices to prevent necrotizing enterocolitis drive different microbiome profiles and functional responses in the preterm intestine
Source: Research Square preprint supplement (doi:10.21203/rs.3.rs-1807088/v1), 2022-07-06

*Table 2: Distribution of overall metagenomic reads across the domains of life and between the centres on different taxonomic levels.*


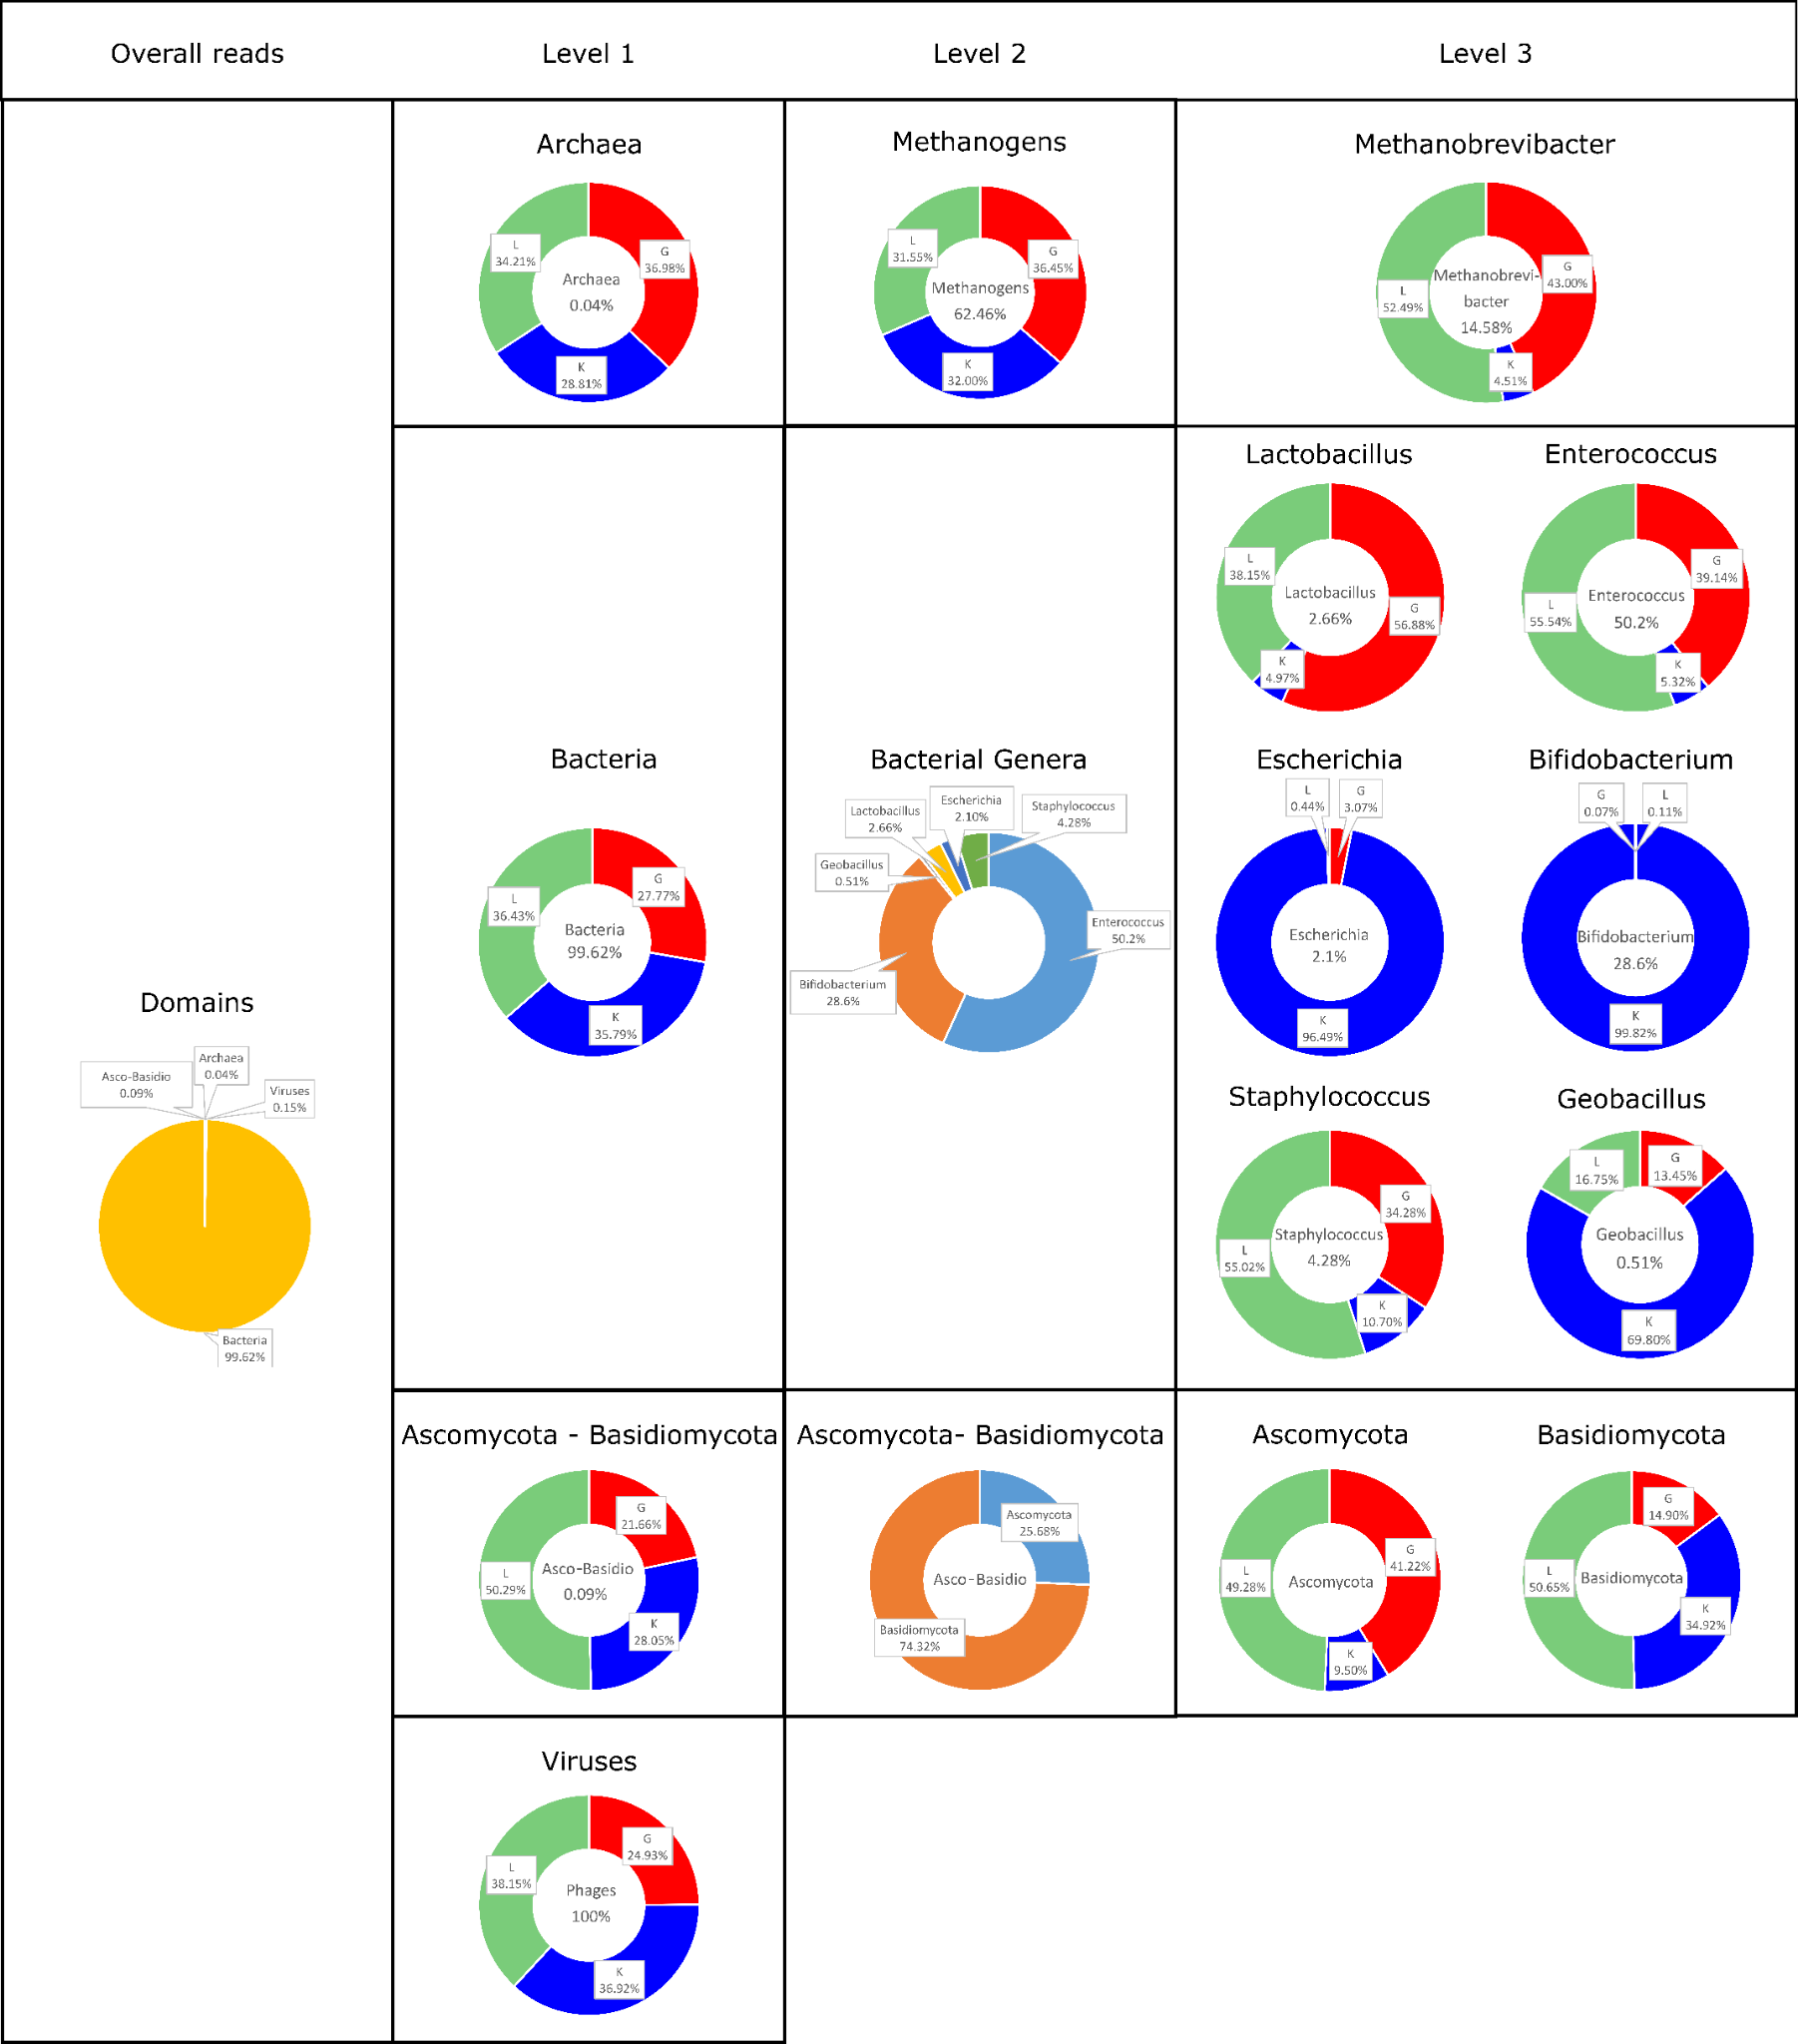

Supplement: Supplementary file 2 [file c3ce6edab02f4c9ba4d60104.docx]
